# Supplementary material for: Coping with healthcare costs for chronic illness in low-income and middle-income countries: a systematic literature review
Source: PubMed Central journal article supplement (PMC6730576; doi:10.1136/bmjgh-2019-001475), 2019-08-21
Supplement: bmjgh-2019-001475supp001.pdf [file bmjgh-2019-001475supp001.pdf]

## Supplementary File 1: Inclusion/Exclusion criteria

| Inclusion                                                                                                            | Exclusion                                           |
|----------------------------------------------------------------------------------------------------------------------|-----------------------------------------------------|
| Published since 1 January 2000                                                                                       | <b>Non- LMIC country</b>                            |
| Includes data relating to at least one strategy for coping with out of pocket costs for dealing with chronic illness | <b>Does not detail a coping strategy</b>            |
| Any type of study                                                                                                    | <b>Non-English language</b>                         |
|                                                                                                                      | <b>Focus on general healthcare or acute illness</b> |
|                                                                                                                      |                                                     |
