# Supplementary material for: Coping with healthcare costs for chronic illness in low-income and middle-income countries: a systematic literature review
Source: PubMed Central journal article supplement (PMC6730576; doi:10.1136/bmjgh-2019-001475), 2019-08-21
Supplement: bmjgh-2019-001475supp002.pdf [file bmjgh-2019-001475supp002.pdf]

Supplementary Table 2

| First Author  | Title                                                                                              | Year | Country(ies) | Study type/data source | Disease             | Coping mechanisms identified                                                                                    | Factors influencing choice                                                                                                                                                                                                                                | SES differences | Evidence of financial, social or health impact |
|---------------|----------------------------------------------------------------------------------------------------|------|--------------|------------------------|---------------------|-----------------------------------------------------------------------------------------------------------------|-----------------------------------------------------------------------------------------------------------------------------------------------------------------------------------------------------------------------------------------------------------|-----------------|------------------------------------------------|
| Abegunde, D O | The economic impact of chronic diseases: how do households respond to shocks? Evidence from Russia | 2008 | Russia       | Cross-sectional survey | "Chronic disease"   | Receive gifts and other transfers                                                                               | <ul style="list-style-type: none"> <li>i. Male head households less likely to receive transfer</li> <li>i. Number of old people positively associated with likelihood of transfer</li> <li>i. Chronic disease increases likelihood of transfer</li> </ul> |                 |                                                |
| Adegoke, SA   | Psychosocial burden of sickle cell disease on the family, Nigeria                                  | 2012 | Nigeria      | Cross-sectional survey | Sickle cell disease | <ul style="list-style-type: none"> <li>i. Leave work to become caregiver</li> <li>ii. Take out loans</li> </ul> |                                                                                                                                                                                                                                                           |                 |                                                |

|                |                                                                                                                            |      |           |                                                                    |                                 |                                                                                                                                                                                           |  |  |  |
|----------------|----------------------------------------------------------------------------------------------------------------------------|------|-----------|--------------------------------------------------------------------|---------------------------------|-------------------------------------------------------------------------------------------------------------------------------------------------------------------------------------------|--|--|--|
| Ae-Ngibise, KA | The experience of caregivers of people living with serious mental disorders: a study from rural Ghana                      | 2015 | Ghana     | Qualitative interviews and focus group discussions with caregivers | Mental disorders                | <ul style="list-style-type: none"> <li>i. Sell belongings (clothes, livestock)</li> <li>ii. Take on extra work</li> <li>iii. Depend on distant relatives for financial support</li> </ul> |  |  |  |
| Agatha, CO     | Expenditure patterns on food and non-food items in HIV/AIDS affected and non-affected households in Kisumu District, Kenya | 2010 | Kenya     | Cross-sectional survey                                             | HIV/AIDS                        | <ul style="list-style-type: none"> <li>i. Reduce food expenditure</li> <li>ii. Sell assets</li> </ul>                                                                                     |  |  |  |
| Aji, B.        | The economic impact of the insured patients with severe chronic and                                                        | 2014 | Indonesia | Qualitative interviews                                             | Severe chronic or acute illness | <ul style="list-style-type: none"> <li>i. Sell goods</li> <li>ii. Borrow</li> <li>iii. Support from family</li> </ul>                                                                     |  |  |  |

|           |                                                                                                      |      |            |                        |                                           |                                                                                                                                                                                                                                             |                                                                                                                                                                                                                                                                                              |                                                                                                                                                                                        |  |
|-----------|------------------------------------------------------------------------------------------------------|------|------------|------------------------|-------------------------------------------|---------------------------------------------------------------------------------------------------------------------------------------------------------------------------------------------------------------------------------------------|----------------------------------------------------------------------------------------------------------------------------------------------------------------------------------------------------------------------------------------------------------------------------------------------|----------------------------------------------------------------------------------------------------------------------------------------------------------------------------------------|--|
|           | acute illnesses: a qualitative approach                                                              |      |            |                        |                                           | iv. Support from employer                                                                                                                                                                                                                   |                                                                                                                                                                                                                                                                                              |                                                                                                                                                                                        |  |
| Arnold, M | Coping with the economic burden of Diabetes, TB and co-prevalence: evidence from Bishkek, Kyrgyzstan | 2016 | Kyrgyzstan | Cross sectional survey | Diabetes (DM)/Tuberculosis (TB)/DM and TB | <ul style="list-style-type: none"> <li>i. Use income or savings</li> <li>ii. Receive social welfare and donations</li> <li>iii. Receive support from social networks</li> <li>iv. Sell household assets</li> <li>v. Borrow money</li> </ul> | <ul style="list-style-type: none"> <li>i. Significant association between <u>employment</u> status, age and equivalence income and choice of coping mechanism</li> <li>ii. TB patients (younger) more likely to use income/savings</li> <li>iii. DM patients (older, female) more</li> </ul> | <ul style="list-style-type: none"> <li>i. Non-statistically significant negative association between patients with higher wealth indices and detrimental coping strategies.</li> </ul> |  |

|        |                                                                                                |      |            |                                            |    |                                                                                                                                                             |                                                                                                                                                                      |  |  |
|--------|------------------------------------------------------------------------------------------------|------|------------|--------------------------------------------|----|-------------------------------------------------------------------------------------------------------------------------------------------------------------|----------------------------------------------------------------------------------------------------------------------------------------------------------------------|--|--|
|        |                                                                                                |      |            |                                            |    |                                                                                                                                                             | likely to use social welfare                                                                                                                                         |  |  |
|        |                                                                                                |      |            |                                            |    |                                                                                                                                                             | iv. Patients who had returned from Russia due to their TB more likely to raise funds through detrimental coping strategies than patients who had not been to Russia. |  |  |
| Aye, R | Factors determining household expenditure for tuberculosis and coping strategies in Tajikistan | 2011 | Tajikistan | Prospective longitudinal survey (4 months) | TB | <ul style="list-style-type: none"> <li>i. Use credit</li> <li>ii. Take out loan</li> <li>iii. Sell productive asset sales (cattle, sheep, goats)</li> </ul> |                                                                                                                                                                      |  |  |

|             |                                                                                                              |      |                   |                                          |                    |                                                                                                                                                                                                                                                      |                                                                                                                                                     |                                                                                                                                                              |  |
|-------------|--------------------------------------------------------------------------------------------------------------|------|-------------------|------------------------------------------|--------------------|------------------------------------------------------------------------------------------------------------------------------------------------------------------------------------------------------------------------------------------------------|-----------------------------------------------------------------------------------------------------------------------------------------------------|--------------------------------------------------------------------------------------------------------------------------------------------------------------|--|
| Azzani, M   | Financial burden of colorectal cancer treatment among patients and their families in a middle-income country | 2016 | Malaysia          | Prospective longitudinal survey (1 year) | Colorectal cancer  | <ul style="list-style-type: none"> <li>i. Use current income and savings</li> <li>ii. Borrow from relatives and friends (vs bank loan)</li> <li>iii. Sell items</li> <li>iv. Receive help (fees exemption) from Social Medical Assistance</li> </ul> |                                                                                                                                                     |                                                                                                                                                              |  |
| Bhojani, U. | Out-of-pocket healthcare payments on chronic conditions impoverish urban poor in Bangalore, India            | 2012 | India (Bangalore) | Census and cross-sectional survey        | Chronic conditions | <ul style="list-style-type: none"> <li>i. Borrow money</li> <li>ii. Sell assets</li> <li>iii. Mortgage assets</li> </ul>                                                                                                                             | <ul style="list-style-type: none"> <li>i. Households significantly more likely to cope using savings when clinics/health centres used as</li> </ul> | <ul style="list-style-type: none"> <li>i. Households from lowest income quintile significantly more likely to borrow money than highest quintile.</li> </ul> |  |

|  |  |  |  |  |  |  |                                                                                                                                                                                                                                                                    |                                                                                              |  |
|--|--|--|--|--|--|--|--------------------------------------------------------------------------------------------------------------------------------------------------------------------------------------------------------------------------------------------------------------------|----------------------------------------------------------------------------------------------|--|
|  |  |  |  |  |  |  | <p>place for consultation compared with referral hospitals and/or super-specialty hospitals)</p> <p>ii. Households using super-specialty hospitals as place for consultation had greater odds of borrowing money than households using clinics/health centres.</p> | <p>i. No households in highest income quintile had to sell and/or mortgage their assets.</p> |  |
|--|--|--|--|--|--|--|--------------------------------------------------------------------------------------------------------------------------------------------------------------------------------------------------------------------------------------------------------------------|----------------------------------------------------------------------------------------------|--|

|            |                                                                                                                               |      |              |                         |                           |                                                                                                                                           |                                                                                                                                                                                                                                      |  |                                                                                                                                                              |
|------------|-------------------------------------------------------------------------------------------------------------------------------|------|--------------|-------------------------|---------------------------|-------------------------------------------------------------------------------------------------------------------------------------------|--------------------------------------------------------------------------------------------------------------------------------------------------------------------------------------------------------------------------------------|--|--------------------------------------------------------------------------------------------------------------------------------------------------------------|
| Bigdeli, M | Access to treatment for diabetes and hypertension in rural Cambodia: performance of existing social health protection schemes | 2016 | Cambodia     | Cross-sectional survey  | DM and hypertension (HTN) | <ul style="list-style-type: none"> <li>i. Use income</li> <li>ii. Borrow money</li> <li>iii. Receive gifts from friends/family</li> </ul> |                                                                                                                                                                                                                                      |  | Multiple sources of money were used when it came time to repay loans, ranging from regular income to increased labour or selling assets, livestock and land. |
| Cleary, S  | Investigating the affordability of key health services in South Africa                                                        | 2013 | South Africa | Patient exit interviews | TB and HIV                | <ul style="list-style-type: none"> <li>i. Borrow money</li> <li>i. Sell assets</li> </ul>                                                 | <ul style="list-style-type: none"> <li>i. Significantly higher rates of borrowing in rural areas vs urban;</li> <li>ii. Higher percentage of users of TB and ART services borrowed or sold assets to cover costs compared</li> </ul> |  |                                                                                                                                                              |

|                |                                                                                                               |      |                |                                                                  |                         |                                                                                                                                                                                                                                                                                                                 |                                      |  |                                                                                                                                                                                                                                                                                         |
|----------------|---------------------------------------------------------------------------------------------------------------|------|----------------|------------------------------------------------------------------|-------------------------|-----------------------------------------------------------------------------------------------------------------------------------------------------------------------------------------------------------------------------------------------------------------------------------------------------------------|--------------------------------------|--|-----------------------------------------------------------------------------------------------------------------------------------------------------------------------------------------------------------------------------------------------------------------------------------------|
|                |                                                                                                               |      |                |                                                                  |                         |                                                                                                                                                                                                                                                                                                                 | to<br>obstetric<br>care<br>patients. |  |                                                                                                                                                                                                                                                                                         |
| Daivadanam, M. | Pathways to catastrophic health expenditure for acute coronary syndrome in Kerala: 'Good health at low cost'? | 2012 | India (Kerala) | Case studies and field notes from patient household observations | Acute Coronary Syndrome | <ul style="list-style-type: none"> <li>i. Remove children from school or send to cheaper school</li> <li>ii. Send children to work</li> <li>iii. Send other family members to work for first time</li> <li>iv. Move from current homes to cheaper or 'free' accommodation</li> <li>v. Fail to comply</li> </ul> |                                      |  | <ul style="list-style-type: none"> <li>i. Exploitation by moneylenders was frequent, (property deeds or other assets that guarantee transactions were seized when families were unable to repay).</li> <li>ii. Lifetime indebtedness may be passed on to the next generation</li> </ul> |



|               |                                                                                               |      |                 |                                       |          |                                                                                                                 |  |  |                                                                                                                                                    |
|---------------|-----------------------------------------------------------------------------------------------|------|-----------------|---------------------------------------|----------|-----------------------------------------------------------------------------------------------------------------|--|--|----------------------------------------------------------------------------------------------------------------------------------------------------|
|               |                                                                                               |      |                 |                                       |          | with treatment<br>, choosing cheaper treatment or cutting treatment short<br>vi. Borrow from local moneylenders |  |  | n, especially in poorer households. Future prospects depleted when children drop out of school.<br>iii. Stigma of being labelled a 'charity case'. |
| Duraisamy, P. | Costs and financial burden of care and support services to PLHA and households in South India | 2007 | India (Chennai) | Cross-section of a cohort study       | HIV/AIDS | i. Borrow money<br>ii. Use savings<br>iii. Sell assets<br>iv. Mortgage assets                                   |  |  |                                                                                                                                                    |
| Foster, N     | The economic burden of TB diagnosis and treatment in South Africa                             | 2015 | South Africa    | Prospective cohort study (2-6 months) | TB       | i. Depend on guardians or carers to take over work                                                              |  |  |                                                                                                                                                    |

|                      |                                                                                                                 |      |          |                        |          |                                                                                                                                                                                                                         |                                                                                     |  |  |
|----------------------|-----------------------------------------------------------------------------------------------------------------|------|----------|------------------------|----------|-------------------------------------------------------------------------------------------------------------------------------------------------------------------------------------------------------------------------|-------------------------------------------------------------------------------------|--|--|
|                      |                                                                                                                 |      |          |                        |          | <ul style="list-style-type: none"> <li>ii. Borrow money</li> <li>iii. Take donations</li> <li>iv. Sell assets</li> <li>v. Take disability grants</li> </ul>                                                             |                                                                                     |  |  |
| Getahun, B           | Tuberculosis care strategies and their economic consequences for patients: the missing link to end tuberculosis | 2016 | Ethiopia | Cross sectional survey | TB       | <ul style="list-style-type: none"> <li>i. Receive transfers from family, neighbours, friends</li> <li>ii. Borrow money from neighbours, friends, relatives, organizations</li> <li>iii. Sell household items</li> </ul> |                                                                                     |  |  |
| Gustafsson-Wright, E | The inequitable impact of health shocks on the uninsured in Namibia                                             | 2011 | Namibia  | Cross-sectional survey | HIV/AIDS | <ul style="list-style-type: none"> <li>i. Take grants, gifts</li> <li>ii. Sell assets</li> <li>iii. Decrease consumption</li> </ul>                                                                                     | Households with private insurance less likely to engage in these coping strategies. |  |  |

|               |                                                                                                                                                    |      |                                   |                        |               |                                                                                                                                                                                                                      |  |                                                                                                                                                                                                                                                                |  |
|---------------|----------------------------------------------------------------------------------------------------------------------------------------------------|------|-----------------------------------|------------------------|---------------|----------------------------------------------------------------------------------------------------------------------------------------------------------------------------------------------------------------------|--|----------------------------------------------------------------------------------------------------------------------------------------------------------------------------------------------------------------------------------------------------------------|--|
|               |                                                                                                                                                    |      |                                   |                        |               | iv. Take loans                                                                                                                                                                                                       |  |                                                                                                                                                                                                                                                                |  |
| Huffman, M    | A cross-sectional study of the microeconomic impact of cardiovascular disease hospitalization in four low- and middle-income countries             | 2011 | Argentina, China, India, Tanzania | Cross-sectional survey | CVD           | Distress financing (borrowing money from relatives/friends, taking loans from banks/other lenders, or selling assets (e.g. property))                                                                                |  | Poor more likely to engage in distress financing.                                                                                                                                                                                                              |  |
| Hutchinson, C | Financial barriers and coping strategies: a qualitative study of accessing multidrug-resistant tuberculosis and tuberculosis care in Yunnan, China | 2017 | China                             | Qualitative interviews | TB and MDR-TB | <ul style="list-style-type: none"> <li>i. Use savings</li> <li>ii. Sell assets (livestock, crops)</li> <li>iii. Borrow from financial institution</li> <li>iv. Receive informal transfers, gifts or loans</li> </ul> |  | <ul style="list-style-type: none"> <li>Exhaustion of resources</li> <li>Reduced consumption</li> <li>Compromises in medication</li> <li>Strained relationships</li> <li>Stigma, shame</li> <li>(Can't say these are long term based on longitudinal</li> </ul> |  |

|            |                                                       |      |       |                                                            |    |                                                                                                                                                                          |  |  |                                              |
|------------|-------------------------------------------------------|------|-------|------------------------------------------------------------|----|--------------------------------------------------------------------------------------------------------------------------------------------------------------------------|--|--|----------------------------------------------|
|            |                                                       |      |       |                                                            |    | <p>from family</p> <p>v. Use replacement labour (e.g. send another family member to work in place of ill member)</p> <p>vi. Take a donation from healthcare provider</p> |  |  | data because study is qual)                  |
| Jackson, S | Poverty and the economic effects of TB in rural China | 2006 | China | Cross-sectional survey (TB cases and sex-matched controls) | TB | <p>i. Borrow from relatives and friends</p> <p>ii. Borrow from banks</p> <p>ii. Sell productive assets (e.g. tractors,</p>                                               |  |  | Poverty a factor in discontinuing treatment. |

|           |                                                                                                                                                      |      |       |                                                                       |      |                                                                                                                     |                                                                                                                                             |                                                           |  |
|-----------|------------------------------------------------------------------------------------------------------------------------------------------------------|------|-------|-----------------------------------------------------------------------|------|---------------------------------------------------------------------------------------------------------------------|---------------------------------------------------------------------------------------------------------------------------------------------|-----------------------------------------------------------|--|
|           |                                                                                                                                                      |      |       |                                                                       |      | draft animals.)                                                                                                     |                                                                                                                                             |                                                           |  |
| Karan, A  | The household-level economic burden of heart disease in India                                                                                        | 2015 | India | Cross-sectional survey (CVD households matched to non-CVD households) | CVD  | i. Borrow money<br>ii. Sell assets                                                                                  | CVD patients more likely to borrow and sell assets to finance care than non-CVD-affected households.                                        |                                                           |  |
| Kastor, A | Disease-specific out-of-pocket and catastrophic health expenditure on hospitalization in India: Do Indian households face distress health financing? | 2018 | India | Cross-sectional survey                                                | NCDs | Distress financing, defined as borrowing money, sale of property/assets or contributions from friends and relatives | i. Cancer, TB, heart disease and injuries showed higher odds of distress financing compared to communicable disease<br>ii. Odds of distress | Odds of distress financing declined with increased wealth |  |

|           |                                                                                                                     |      |      |                        |        |                                                                                                                            |                                                                                                                                                                     |  |  |
|-----------|---------------------------------------------------------------------------------------------------------------------|------|------|------------------------|--------|----------------------------------------------------------------------------------------------------------------------------|---------------------------------------------------------------------------------------------------------------------------------------------------------------------|--|--|
|           |                                                                                                                     |      |      |                        |        |                                                                                                                            | financing declined with higher educational level<br>iii. Likelihood of distress financing higher among inpatients admitted in private hospitals vs public hospitals |  |  |
| Kavosi, Z | Catastrophic health expenditures and coping strategies in households with cancer patients in Shiraz Namazi Hospital | 2014 | Iran | Cross-sectional survey | Cancer | i. Use current income<br>ii. Receive insurance reimbursement<br>iii. Use savings<br>iv. Borrow money<br>v. Sell properties | Use of income, savings and insurance more likely among those who do not experience catastrophic spending.                                                           |  |  |

|           |                                                                                                                                                                                     |      |              |                        |    |                                                                                                                                                                                                                 |                                                                                                                       |  |                                                                     |
|-----------|-------------------------------------------------------------------------------------------------------------------------------------------------------------------------------------|------|--------------|------------------------|----|-----------------------------------------------------------------------------------------------------------------------------------------------------------------------------------------------------------------|-----------------------------------------------------------------------------------------------------------------------|--|---------------------------------------------------------------------|
| Laokri, A | Assessing the economic burden of illness for tuberculosis patients in Benin: determinants and consequences of catastrophic health expenditures and inequities                       | 2014 | Benin        | Cross-sectional survey | TB | <ul style="list-style-type: none"> <li>i. Deplete savings</li> <li>ii. Borrow money</li> <li>iii. Sell assets (e.g. cattle, seeds, piece of land)</li> <li>iv. Cut budgets (e.g. housing, education)</li> </ul> | Higher-income households more likely to deplete savings while lower-income households more likely to become indebted. |  |                                                                     |
| Laokri, A | Catastrophic out-of-pocket health costs due to inefficient management of the health-care system: an evidence-based case study of tuberculosis control program in rural Burkina Faso | 2011 | Burkina Faso | Cross-sectional survey | TB | <ul style="list-style-type: none"> <li>i. Incur debts</li> <li>ii. Sell cattle, seeds for following year's sowing or land</li> <li>iii. Take loans from family or community members</li> </ul>                  |                                                                                                                       |  | In some cases households depleted all their savings on TB treatment |

|            |                                                                                                                                           |      |          |                                                             |     |                                                                                                                                                                                                                                                                     |                                                                                     |  |  |
|------------|-------------------------------------------------------------------------------------------------------------------------------------------|------|----------|-------------------------------------------------------------|-----|---------------------------------------------------------------------------------------------------------------------------------------------------------------------------------------------------------------------------------------------------------------------|-------------------------------------------------------------------------------------|--|--|
| Lonroth, K | Social franchising of TB care through private GPs in Myanmar: an assessment of treatment results, access, equity and financial protection | 2007 | Myanmar  | Prospective (facility-based) longitudinal survey (6 months) | TB  | Borrow money                                                                                                                                                                                                                                                        | Higher proportion of poor had to borrow money compared with higher income patients. |  |  |
| Lopera, MM | Out-of-pocket expenditures and coping strategies for people living with HIV: Bogota, Colombia, 2009                                       | 2011 | Colombia | Cross-sectional survey                                      | HIV | <ul style="list-style-type: none"> <li>i. Ask extended family or friends to take care of children permanently</li> <li>ii. Borrow from friends</li> <li>iii. Default on debts</li> <li>iv. Sell assets or properties</li> <li>v. Reduce food consumption</li> </ul> |                                                                                     |  |  |



|  |  |  |  |  |  |                                                                                                                                                                                                                                                                                                                                                                                  |  |  |  |
|--|--|--|--|--|--|----------------------------------------------------------------------------------------------------------------------------------------------------------------------------------------------------------------------------------------------------------------------------------------------------------------------------------------------------------------------------------|--|--|--|
|  |  |  |  |  |  | <ul style="list-style-type: none"><li>vi. Reduce quality of life</li><li>vii. Institutionalize HIV patient</li><li>viii. Remove children from school</li><li>ix. Borrow from institutions</li><li>x. Take on more work to cover expenses</li><li>xi. Institutionalize children without HIV</li><li>xii. Stop working to take care of person with HIV (vs. paying for a</li></ul> |  |  |  |
|--|--|--|--|--|--|----------------------------------------------------------------------------------------------------------------------------------------------------------------------------------------------------------------------------------------------------------------------------------------------------------------------------------------------------------------------------------|--|--|--|

|            |                                                                     |      |                |                        |               |                                                                                                                                                                                                                                                                                                                                                                                                                     |                                                                                                                                                                                                                                                                      |                                                                                                                                                                                                                                                                                                                  |  |
|------------|---------------------------------------------------------------------|------|----------------|------------------------|---------------|---------------------------------------------------------------------------------------------------------------------------------------------------------------------------------------------------------------------------------------------------------------------------------------------------------------------------------------------------------------------------------------------------------------------|----------------------------------------------------------------------------------------------------------------------------------------------------------------------------------------------------------------------------------------------------------------------|------------------------------------------------------------------------------------------------------------------------------------------------------------------------------------------------------------------------------------------------------------------------------------------------------------------|--|
|            |                                                                     |      |                |                        |               | caregiver<br>)                                                                                                                                                                                                                                                                                                                                                                                                      |                                                                                                                                                                                                                                                                      |                                                                                                                                                                                                                                                                                                                  |  |
| Maneeta, J | Economic burden of breast cancer to the households in Punjab, India | 2016 | India (Punjab) | Cross-sectional survey | Breast cancer | <ul style="list-style-type: none"> <li>i. Borrow money</li> <li>ii. Receive support from social network</li> <li>iii. Use savings</li> <li>iv. Sell financial assets</li> <li>v. Delay payment of pre-existing loans</li> <li>vi. Sell economically productive assets</li> <li>vii. Rent out rooms in house</li> <li>viii. Delay payment of bills</li> <li>ix. Pawn jewellery</li> <li>x. Borrow at high</li> </ul> | <ul style="list-style-type: none"> <li>i. Patients with stage 2 cancer or above more likely to engage in distress financing compared to earlier stages</li> <li>ii. Urban households less likely to face distress financing compared to rural households.</li> </ul> | <ul style="list-style-type: none"> <li>i. Households with lower per capita income more likely to use 'distress financing' than higher income households.</li> <li>ii. Lower annual household income significantly associated with reduced food expenditure, reduced expenditure on education, reduced</li> </ul> |  |

|          |                                                                                                                                     |      |       |                                         |    |                                                                                                                                                                |  |                                                                                                                                                                                               |  |
|----------|-------------------------------------------------------------------------------------------------------------------------------------|------|-------|-----------------------------------------|----|----------------------------------------------------------------------------------------------------------------------------------------------------------------|--|-----------------------------------------------------------------------------------------------------------------------------------------------------------------------------------------------|--|
|          |                                                                                                                                     |      |       |                                         |    | <p>rate of interest</p> <p>xi. Take credit from a local shop</p> <p>xii. Take financial aid (from govt or NGO)</p> <p>xiii. Early entry into labour market</p> |  | <p>expenditure on social events, and early entry into labour market.</p> <p>iii. None of these strategies were adopted by upper income households.</p>                                        |  |
| Mauch, V | Assessing access barriers to tuberculosis care with the tool to Estimate Patients' Costs: pilot results from two districts in Kenya | 2011 | Kenya | Cross-sectional survey (facility based) | TB | <p>i. Borrow money</p> <p>ii. Sell assets (mostly livestock)</p>                                                                                               |  | <p>Middle-income patients selling significantly more than low- or high-income patients. (Those who sold assets gained significantly less than the market price estimated by the patient).</p> |  |

|              |                                                                                                       |      |                                    |                                         |    |                                                                                                                                                                   |                                                                                                                  |  |  |
|--------------|-------------------------------------------------------------------------------------------------------|------|------------------------------------|-----------------------------------------|----|-------------------------------------------------------------------------------------------------------------------------------------------------------------------|------------------------------------------------------------------------------------------------------------------|--|--|
| Mauch, V     | Free tuberculosis diagnosis and treatment are not enough: patient cost evidence from three continents | 2013 | Ghana, Vietnam, Dominican Republic | Cross-sectional survey                  | TB | <ul style="list-style-type: none"> <li>i. Sell property (land, livestock, other)</li> <li>ii. Take out loans (at interest &gt;10% or without interest)</li> </ul> | Differences by country: selling property most common in Ghana; borrowing money most common in Ghana and Vietnam. |  |  |
| Muniyandi, M | Costs to patients with tuberculosis treated under DOTS programme.                                     | 2005 | India                              | Cross-sectional survey (facility based) | TB | Borrow money                                                                                                                                                      |                                                                                                                  |  |  |

|               |                                                                                                                                       |      |          |                                                              |          |                                                                                                                                                                                                                                                                                               |                                                                                                                                  |                                                                                                |  |
|---------------|---------------------------------------------------------------------------------------------------------------------------------------|------|----------|--------------------------------------------------------------|----------|-----------------------------------------------------------------------------------------------------------------------------------------------------------------------------------------------------------------------------------------------------------------------------------------------|----------------------------------------------------------------------------------------------------------------------------------|------------------------------------------------------------------------------------------------|--|
| Murphy, A     | The economic burden of chronic disease care faced by households in Ukraine: a cross-sectional matching study of angina patients       | 2013 | Ukraine  | Cross-sectional survey (angina patients matched to controls) | Angina   | <ul style="list-style-type: none"> <li>i. Use income</li> <li>ii. Use savings</li> <li>iii. Sell assets</li> <li>iv. Borrow from friends or family</li> <li>v. Borrow from others</li> </ul>                                                                                                  | Odds of engaging in 'sale of assets' to finance OPP significantly higher among angina households (vs. households without angina) |                                                                                                |  |
| Mutyambizi, V | An exploratory study of the resources used by, and the coping strategies of poor urban households affected by HIV/AIDS in Harare City | 2002 | Zimbabwe | Cross-sectional survey and focus group discussions and       | HIV/AIDS | <ul style="list-style-type: none"> <li>i. Borrow money</li> <li>ii. Reduce expenditure</li> <li>iii. Seek alternative care</li> <li>iv. Sell assets</li> <li>v. Receive NGO support</li> <li>vi. Seek cheaper provider</li> <li>vii. Stop treatment</li> <li>viii. Delay treatment</li> </ul> | Strategy differed according to social capital available (e.g. NGO support)                                                       | Lower income community had higher social capital and used social network resources more often. |  |

|                   |                                                                                                         |      |              |                                                 |          |                                                                                                     |  |  |  |
|-------------------|---------------------------------------------------------------------------------------------------------|------|--------------|-------------------------------------------------|----------|-----------------------------------------------------------------------------------------------------|--|--|--|
|                   |                                                                                                         |      |              |                                                 |          | ix. Receive social welfare or medical aid<br>x. Use savings                                         |  |  |  |
| Oni, SA           | The economic impact of HIV/AIDS on rural households in Limpopo province                                 | 2002 | South Africa | Cross-sectional survey                          | HIV/AIDS | i. Sell household assets<br>ii. Withdraw children from school<br>iii. Join community support groups |  |  |  |
| Oluwagbemi ga, AE | HIV/AIDS and family support systems: a situation analysis of people living with HIV/AIDS in Lagos State | 2007 | Nigeria      | Focus group discussions and in-depth interviews | HIV/AIDS | i. Sell property<br>ii. Take children out of school                                                 |  |  |  |

|           |                                                                                                                      |      |         |                         |            |                                                                                                                                                                                                                                                                              |  |  |  |
|-----------|----------------------------------------------------------------------------------------------------------------------|------|---------|-------------------------|------------|------------------------------------------------------------------------------------------------------------------------------------------------------------------------------------------------------------------------------------------------------------------------------|--|--|--|
| Palmer, M | The Economic Lives of People with Disabilities in Vietnam                                                            | 2015 | Vietnam | Focus group discussions | Disability | <ul style="list-style-type: none"> <li>i. Borrow (from money lenders, local organizations, family and friends)</li> <li>ii. Draw on savings</li> <li>iii. Substitute labour within household</li> <li>iv. Cut-back on, or forego, disability-related expenditures</li> </ul> |  |  |  |
| Palmer, M | Healthcare utilization, cost burden and coping strategies by disability status: an analysis of the Viet Nam National | 2011 | Vietnam | Cross-sectional survey  | Disability | <ul style="list-style-type: none"> <li>i. Use income</li> <li>ii. Use savings</li> <li>iii. Borrow money</li> <li>iv. Sell home produce</li> <li>v. Work more to</li> </ul>                                                                                                  |  |  |  |

|           |                                                                       |      |           |                                                 |    |                                                                                                                                                                                                                                                                                                  |  |  |                                                                                                                                                                                                                                                                                             |
|-----------|-----------------------------------------------------------------------|------|-----------|-------------------------------------------------|----|--------------------------------------------------------------------------------------------------------------------------------------------------------------------------------------------------------------------------------------------------------------------------------------------------|--|--|---------------------------------------------------------------------------------------------------------------------------------------------------------------------------------------------------------------------------------------------------------------------------------------------|
|           | Health Survey                                                         |      |           |                                                 |    | vi. Receive financial support from outside household                                                                                                                                                                                                                                             |  |  |                                                                                                                                                                                                                                                                                             |
| Perera, M | Falling into the medical poverty trap in Sri Lanka: what can be done? | 2007 | Sri Lanka | Focus group discussions and in-depth interviews | DM | <ul style="list-style-type: none"> <li>i. Pawn or sell assets (often income earning assets such as land or businesses)</li> <li>ii. Take out loans</li> <li>iii. Take children out of school</li> <li>iv. Receive financial or in-kind assistance from government poverty alleviation</li> </ul> |  |  | <ul style="list-style-type: none"> <li>i. Income-earning potential diminished due to sale of income-earning assets.</li> <li>ii. Long-term nature of diabetes costs pushed households into poverty and prevented recovery.</li> <li>iii. Healthcare cost burden exacerbated poor</li> </ul> |



|                  |                                                                                                                                                                                                     |      |          |                                                                                                    |                                                                    |                                                                                                                                                                     |  |                                             |                                                                                                                                                                                                                      |
|------------------|-----------------------------------------------------------------------------------------------------------------------------------------------------------------------------------------------------|------|----------|----------------------------------------------------------------------------------------------------|--------------------------------------------------------------------|---------------------------------------------------------------------------------------------------------------------------------------------------------------------|--|---------------------------------------------|----------------------------------------------------------------------------------------------------------------------------------------------------------------------------------------------------------------------|
|                  |                                                                                                                                                                                                     |      |          |                                                                                                    |                                                                    | programs<br>,<br>employers,<br>family<br>members<br>or<br>communi-<br>ty                                                                                            |  |                                             | health -<br>when<br>househol-<br>ds could<br>no longer<br>afford<br>treatment<br>,<br>likelihoo-<br>d of<br>recurrent<br>acute<br>phases<br>increased<br>, in turn<br>leading to<br>higher<br>healthcar-<br>e costs. |
| Prakongsai,<br>P | The<br>implications<br>of benefit<br>package<br>design: the<br>impact on<br>poor Thai<br>households<br>of excluding<br>renal<br>replacement<br>therapy.<br>(Special<br>Issue:<br>Managing<br>risks: | 2009 | Thailand | Case studies<br>(semi-<br>structured<br>and in-depth<br>interviews,<br>and direct<br>observation). | Renal<br>replacement<br>therapy for<br>End-stage<br>renal disease. | i. Reduce<br>frequency<br>of<br>dialyses<br>ii. Reduce<br>food<br>consump-<br>tion<br>iii. Use<br>public<br>transporta-<br>tion to<br>hospitals<br>iv. Take<br>high |  | Strategies<br>more<br>common<br>among poor. |                                                                                                                                                                                                                      |

|             |                                                                                       |      |                    |                                                                 |                   |                                                                                                                                                                  |  |  |  |
|-------------|---------------------------------------------------------------------------------------|------|--------------------|-----------------------------------------------------------------|-------------------|------------------------------------------------------------------------------------------------------------------------------------------------------------------|--|--|--|
|             | household illness costs, coping strategies and access to social protection.)          |      |                    |                                                                 |                   | interest loans                                                                                                                                                   |  |  |  |
| Prasanna, T | Catastrophic costs of tuberculosis care: a mixed methods study from Puducherry, India | 2018 | India (Puducherry) | Cross-sectional survey and qualitative interviews with patients | TB                | <ul style="list-style-type: none"> <li>i. Borrow money</li> <li>ii. Sell household property</li> <li>iii. Pledge jewels</li> <li>iv. Dissolve savings</li> </ul> |  |  |  |
| Ramma, L    | Patients' costs associated with seeking and accessing treatment for drug-resistant    | 2015 | South Africa       | Cross-sectional survey                                          | Drug resistant TB | Loans                                                                                                                                                            |  |  |  |

|           |                                                                                             |      |          |                        |    |                                                                                                                                                                                                                                                                                                                    |  |                                                                                                                                                                                                                                                                   |  |
|-----------|---------------------------------------------------------------------------------------------|------|----------|------------------------|----|--------------------------------------------------------------------------------------------------------------------------------------------------------------------------------------------------------------------------------------------------------------------------------------------------------------------|--|-------------------------------------------------------------------------------------------------------------------------------------------------------------------------------------------------------------------------------------------------------------------|--|
|           | tuberculosis in South Africa                                                                |      |          |                        |    |                                                                                                                                                                                                                                                                                                                    |  |                                                                                                                                                                                                                                                                   |  |
| Saqib, SE | Economic burden of tuberculosis and its coping mechanism at the household level in Pakistan | 2018 | Pakistan | Cross-sectional survey | TB | <ul style="list-style-type: none"> <li>i. Borrow money</li> <li>ii. Sell productive assets (e.g. cattle, gold, silver, property)</li> <li>iii. Withdraw children from school</li> <li>iv. Reduce household expenditure on daily needs</li> <li>v. Use household savings</li> <li>vi. Take on additional</li> </ul> |  | <ul style="list-style-type: none"> <li>i. Borrowing money, selling assets, withdrawing children from school and taking on extra work more common among lower-income households</li> <li>ii. Use of savings more common among higher-income households.</li> </ul> |  |

|              |                                                                                                                               |      |          |                        |                        |                                                                                                                                                                                |  |  |  |
|--------------|-------------------------------------------------------------------------------------------------------------------------------|------|----------|------------------------|------------------------|--------------------------------------------------------------------------------------------------------------------------------------------------------------------------------|--|--|--|
|              |                                                                                                                               |      |          |                        |                        | working hours, including overtime work and second jobs<br>vii. Receive religious aid                                                                                           |  |  |  |
| Schneider, P | Paying for HIV/AIDS services—lessons from National Health Accounts and community-based health insurance in Rwanda, 1998–1999. | 2001 | Rwanda   | Cross-sectional survey | HIV/AIDS               | i. Receive assistance (from family/friend, church, employer, health insurance, international organization, NGO, other private sources)<br>ii. Borrow money<br>iii. Sell assets |  |  |  |
| Sukeri, S    | Does tax-based health financing offer                                                                                         | 2017 | Malaysia | Cross-sectional survey | Ischemic heart disease | i. Borrow money<br>ii. Sell assets                                                                                                                                             |  |  |  |

|           |                                                                                                                                                                                         |      |          |                        |                                                            |                                                                                                                                                          |                                                                                 |  |  |
|-----------|-----------------------------------------------------------------------------------------------------------------------------------------------------------------------------------------|------|----------|------------------------|------------------------------------------------------------|----------------------------------------------------------------------------------------------------------------------------------------------------------|---------------------------------------------------------------------------------|--|--|
|           | protection from financial catastrophe? Findings from a household economic impact survey of ischaemic heart disease in Malaysia                                                          |      |          |                        |                                                            |                                                                                                                                                          |                                                                                 |  |  |
| Tolla, MT | Out-of-pocket expenditures for prevention and treatment of cardiovascular disease in general and specialised cardiac hospitals in Addis Ababa, Ethiopia: a cross-sectional cohort study | 2017 | Ethiopia | Cross-sectional survey | Ischemic heart disease, stroke, hypertension, dyslipidemia | <ul style="list-style-type: none"> <li>i. Use savings</li> <li>ii. Receive family support</li> <li>iii. Borrow money</li> <li>iv. Sell assets</li> </ul> | Coping strategies more common for inpatient care compared with outpatient care. |  |  |

|               |                                                                                                                                                                                                              |      |            |                                                   |                                               |                                                                                                                                                                                               |  |  |  |
|---------------|--------------------------------------------------------------------------------------------------------------------------------------------------------------------------------------------------------------|------|------------|---------------------------------------------------|-----------------------------------------------|-----------------------------------------------------------------------------------------------------------------------------------------------------------------------------------------------|--|--|--|
| Uddin, MJ     | Consequences of hypertension and chronic obstructive pulmonary disease, healthcare-seeking behaviors of patients, and responses of the health system: a population-based cross-sectional study in Bangladesh | 2014 | Bangladesh | Cross-sectional survey and qualitative interviews | HTN and Chronic Obstructive Pulmonary Disease | <ul style="list-style-type: none"> <li>i. Borrow from friend or relative</li> <li>ii. Reduce expenditure on food or other items</li> <li>iii. Use savings</li> <li>iv. Sell assets</li> </ul> |  |  |  |
| Ukwaja, K. N. | The high cost of free tuberculosis services: patient and household costs associated with tuberculosis care in Ebonyi State, Nigeria                                                                          | 2013 | Nigeria    | Cross-sectional survey                            | TB                                            | <ul style="list-style-type: none"> <li>i. Borrow money</li> <li>ii. Sell assets</li> <li>iii. Borrow money and sell assets</li> </ul>                                                         |  |  |  |

|            |                                                                         |      |       |                        |          |                                                                                                         |                                                                                                                                                                                                                                   |  |  |
|------------|-------------------------------------------------------------------------|------|-------|------------------------|----------|---------------------------------------------------------------------------------------------------------|-----------------------------------------------------------------------------------------------------------------------------------------------------------------------------------------------------------------------------------|--|--|
| Wafula, CO | Economic impact of HIV/AIDS on rural households in Suba District, Kenya | 2013 | Kenya | Cross-sectional survey | HIV/AIDS | <ul style="list-style-type: none"> <li>i. Withdraw savings</li> <li>ii. Sell assets (cattle)</li> </ul> | <ul style="list-style-type: none"> <li>i. Likelihood of withdrawing savings highest among households with patients at more advanced stages of disease.</li> <li>ii. Cattle sale increased with advanced stages of HIV.</li> </ul> |  |  |
|------------|-------------------------------------------------------------------------|------|-------|------------------------|----------|---------------------------------------------------------------------------------------------------------|-----------------------------------------------------------------------------------------------------------------------------------------------------------------------------------------------------------------------------------|--|--|
